# Supplementary material for: Investigation of the molecular and mechanistic basis for the regioselective metabolism of midazolam by cytochrome P450 3A4
Source: Royal Society of Chemistry journal article supplement (doi:10.1039/d2cp00232a), 2022-01-01
Supplement: d2cp00232a1.pdf [file d2cp00232a1.pdf]

Supplementary Information for

**Investigation of the Molecular and Mechanistic Basis for the Regioselective  
Metabolism of Midazolam by Cytochrome P450 3A4**

Tingting Fu<sup>a</sup>, Qingchuan Zheng<sup>a,b,\*</sup> and Hongxing Zhang<sup>a,\*</sup>

*<sup>a</sup> Institute of Theoretical Chemistry, College of Chemistry, Jilin University, Changchun 130023,  
China*

*<sup>b</sup> Key Laboratory for Molecular Enzymology and Engineering of the Ministry of Education, Jilin  
University, Changchun 130023, China*

**\*Corresponding authors**

E-mail addresses: zhengqc@jlu.edu.cn (Qingchuan Zheng), zhanghx@jlu.edu.cn (Hongxing Zhang).

## List of contents:

**Table. S1** Hydrogen bond analysis for the single-ligand complex.

**Fig. S1** The crystal structure of CYP3A4 (PDB ID: 5TE8). The heme (grey) and residues that make up the “sandwich” structure (cyan) are shown in sticks. The F-F' loops, G-G' loops, F' and G' regions are highlighted in dark grey. Moreover, the active site, the allosteric site proposed by Redhair et al.<sup>1</sup>, and the allosteric site reported by Denisov et al.<sup>2</sup> are highlighted by orange, yellow and green, respectively.

**Fig. S2** CYP3A4 structural model and evaluation results. **(a)** is the full-length CYP3A4 structure, and **(b)** is the Ramachandran plot and its detailed information calculated by MolProbity tool.

**Fig. S3** The complex model of MDZ and CYP3A4: **(a)** single-ligand complex (CYP3A4-MDZ), **(b)** multiple-ligand complex (CYP3A4-MDZ-effectors). The heme (yellow), substrate (lime) and effectors (magenta and cyan) are shown in sticks.

**Fig. S4** The RMSD values of protein backbone atoms, backbone atoms of active site residues (within 5 Å of heme) and ligand heavy atoms in **(a)** CYP3A4-MDZ and **(b)** CYP3A4-MDZ-effectors systems.

**Fig. S5** Superposition of the binding poses (lime) identified from cMD simulation and crystal structure (PDB ID: 5TE8, blue). The heme (yellow) and MDZ are shown in sticks.

**Fig. S6** The distance between oxidation sites (C1' and C4 positions) of MDZ and heme iron in CYP3A4-MDZ **(a-d)** and CYP3A4-MDZ-effectors complexes **(e and f)**.

**Fig. S7** The distance between effectors and heme iron in the aMD trajectories 1 and 2. The representative conformations of Effector A at 40, 120, 17 ns are shown as cartoons, respectively.

**Fig. S8** The superimposed conformation of three substrate binding poses in CYP3A4-MDZ-effectors system. The F-F' and C-terminal loops are highlighted in orange, green and blue in pose **A**, **B** and **C**, respectively.

**Table. S1** Hydrogen bond analysis for the single-ligand complex.

| Acceptor | Donor     | Fraction (%) | Average distance (Å) | Average angle (°) |
|----------|-----------|--------------|----------------------|-------------------|
| Pose A   |           |              |                      |                   |
| MDZ@N2   | S119@HG   | 34.6         | 2.83                 | 156.97            |
| MDZ@N2   | R105@HE   | 1.77         | 2.89                 | 147.46            |
| Pose B   |           |              |                      |                   |
| MDZ@N2   | S119@HG   | 11.8         | 2.85                 | 158.40            |
| MDZ@N1   | R105@HH12 | 2.64         | 2.91                 | 151.89            |
| Pose C   |           |              |                      |                   |
| MDZ@N2   | S119@HG   | 1.11         | 2.87                 | 157.96            |

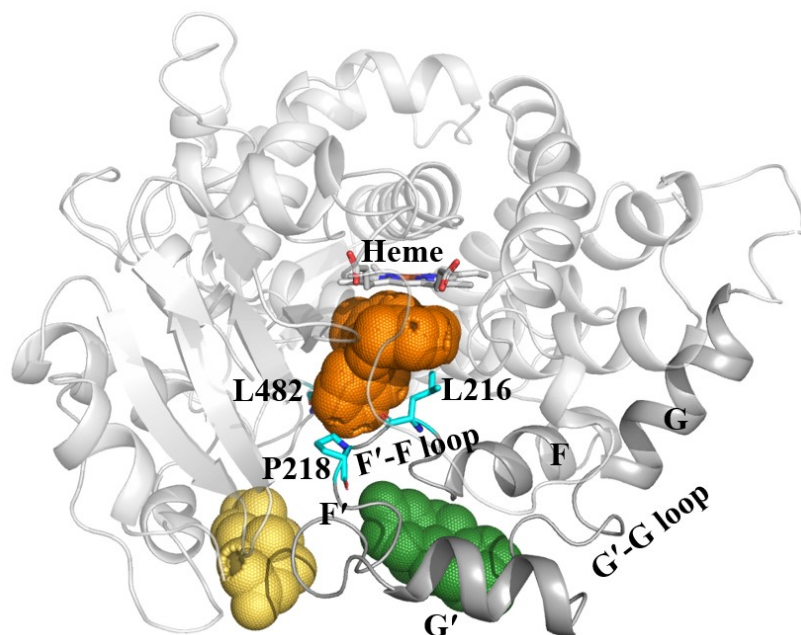

**Fig. S1** The crystal structure of CYP3A4 (PDB ID: 5TE8). The heme (grey) and residues that make up the “sandwich” structure (cyan) are shown in sticks. The F-F' loops, G-G' loops, F' and G' regions are highlighted in dark grey. Moreover, the active site, the allosteric site proposed by Redhair et al.<sup>1</sup>, and the allosteric site reported by Denisov et al.<sup>2</sup> are highlighted by orange, yellow and green, respectively.



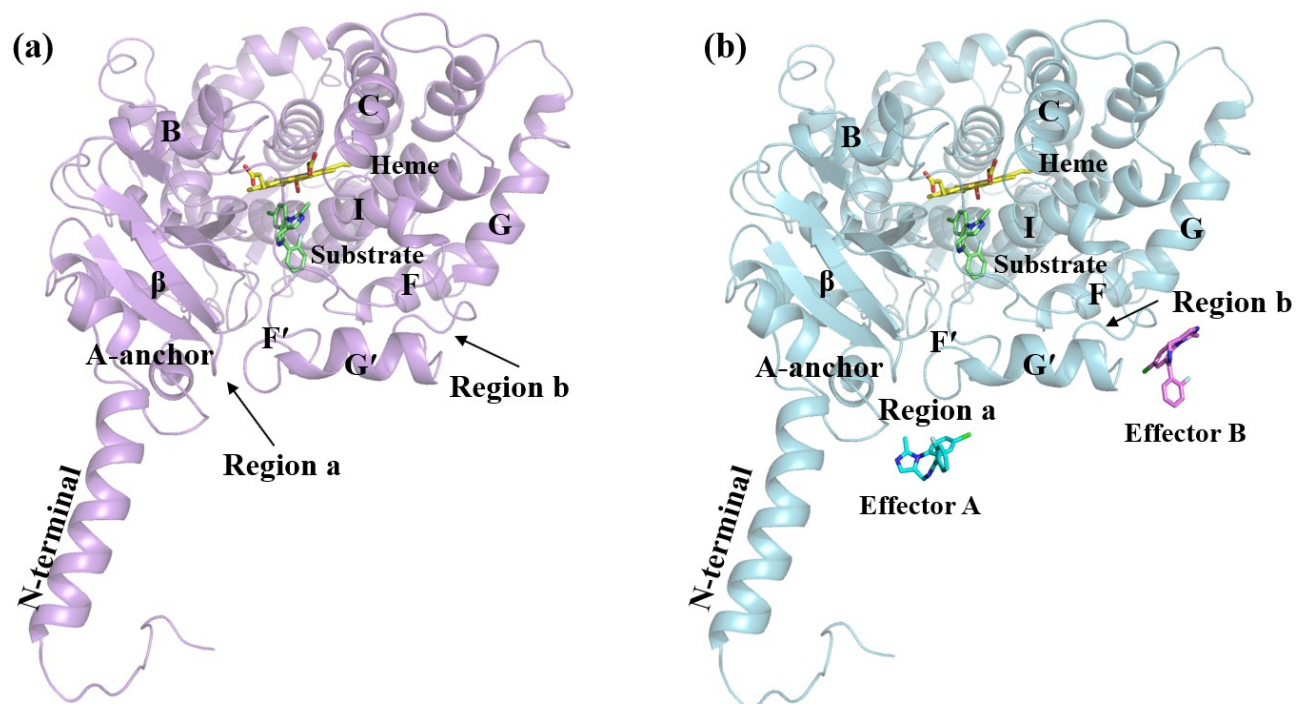

**Fig. S3** The complex model of MDZ and CYP3A4: (a) single-ligand complex (CYP3A4-MDZ), (b) multiple-ligand complex (CYP3A4-MDZ-effectors). The heme (yellow), substrate (lime) and effectors (magenta and cyan) are shown in sticks.

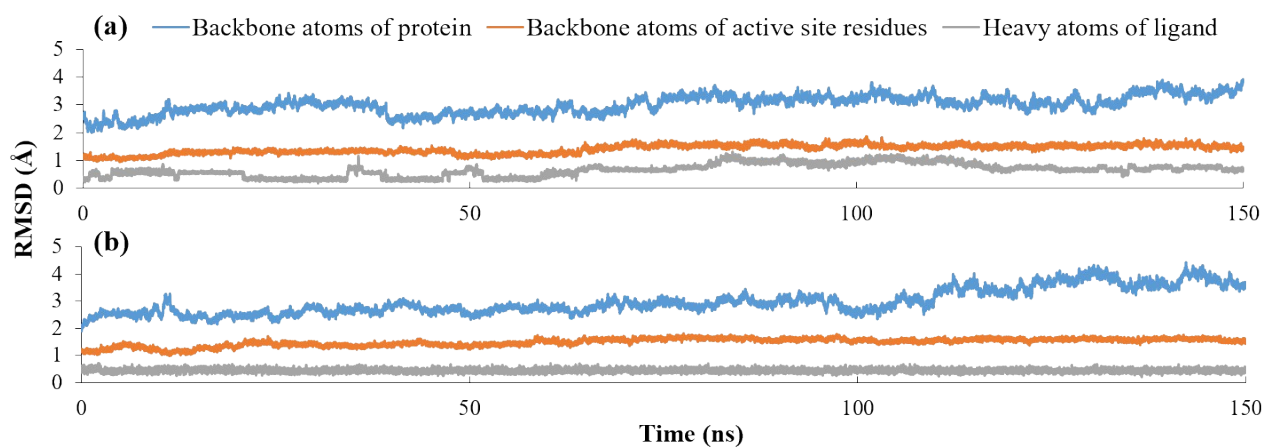

**Fig. S4** The RMSD values of protein backbone atoms, backbone atoms of active site residues (within 5 Å of heme) and ligand heavy atoms in (a) CYP3A4-MDZ and (b) CYP3A4-MDZ-effectors systems.

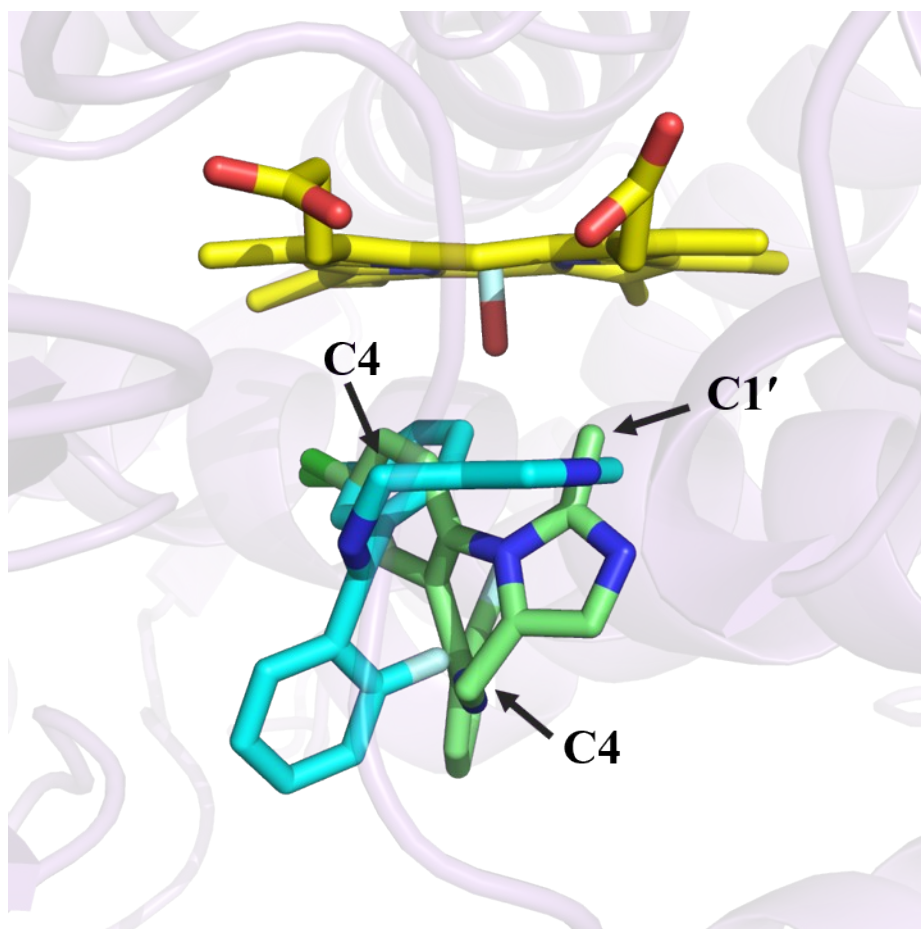

**Fig. S5** Superposition of the binding poses (lime) identified from cMD simulation and crystal structure (PDB ID: 5TE8, cyan). The heme (yellow) and MDZ are shown in sticks.

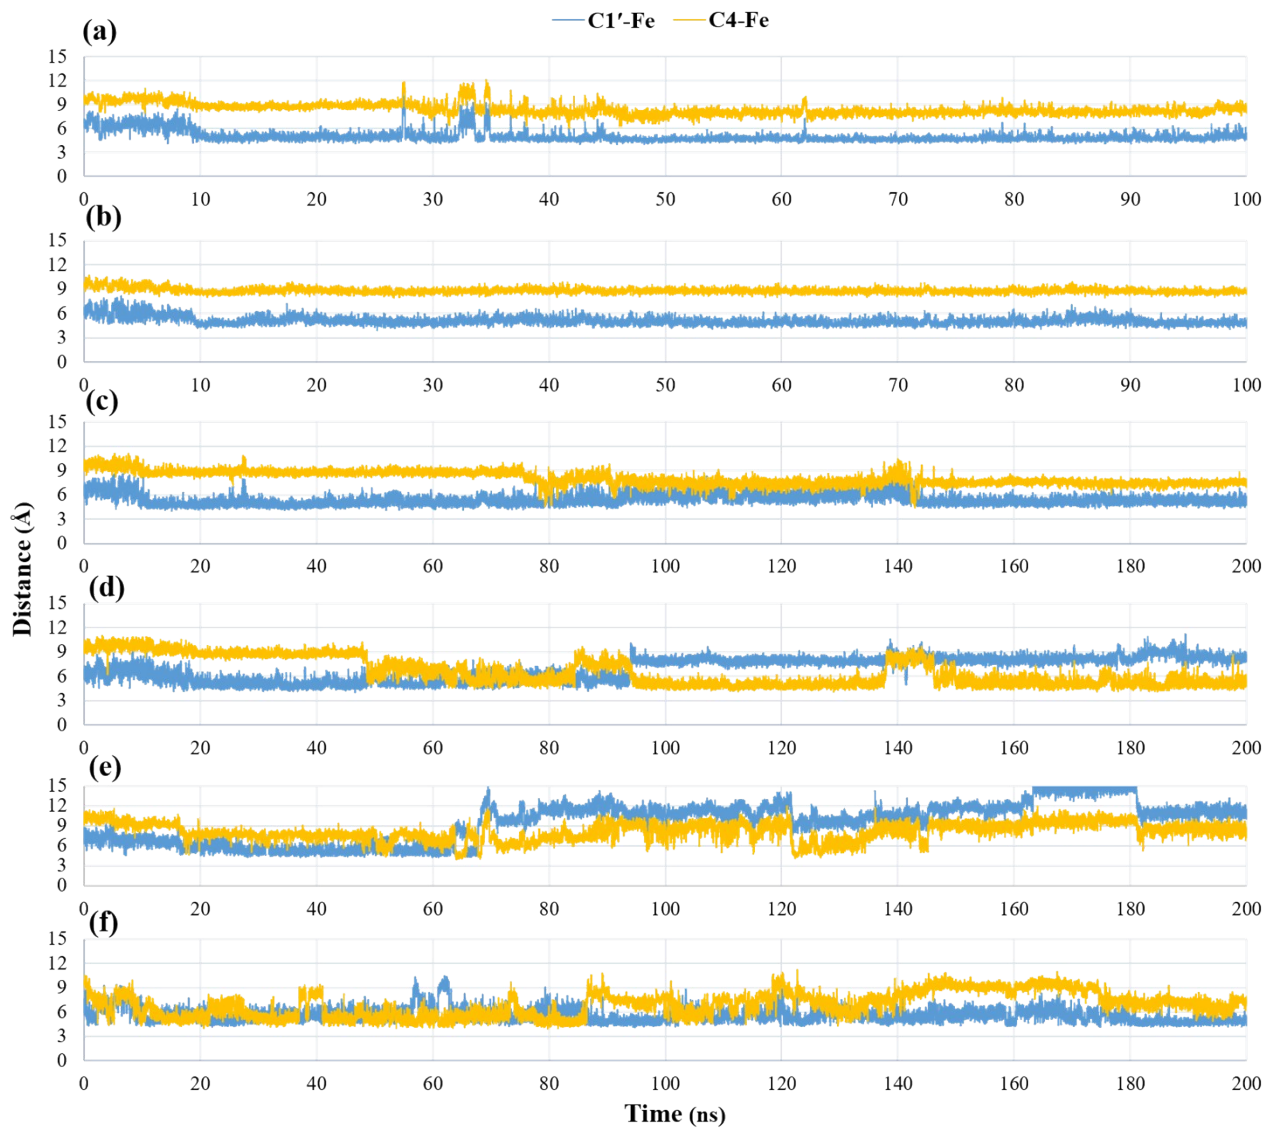

**Fig. S6** The distance between oxidation sites (C1' and C4 positions) of MDZ and heme iron in CYP3A4-MDZ (**a-d**) and CYP3A4-MDZ-effector complexes (**e** and **f**).

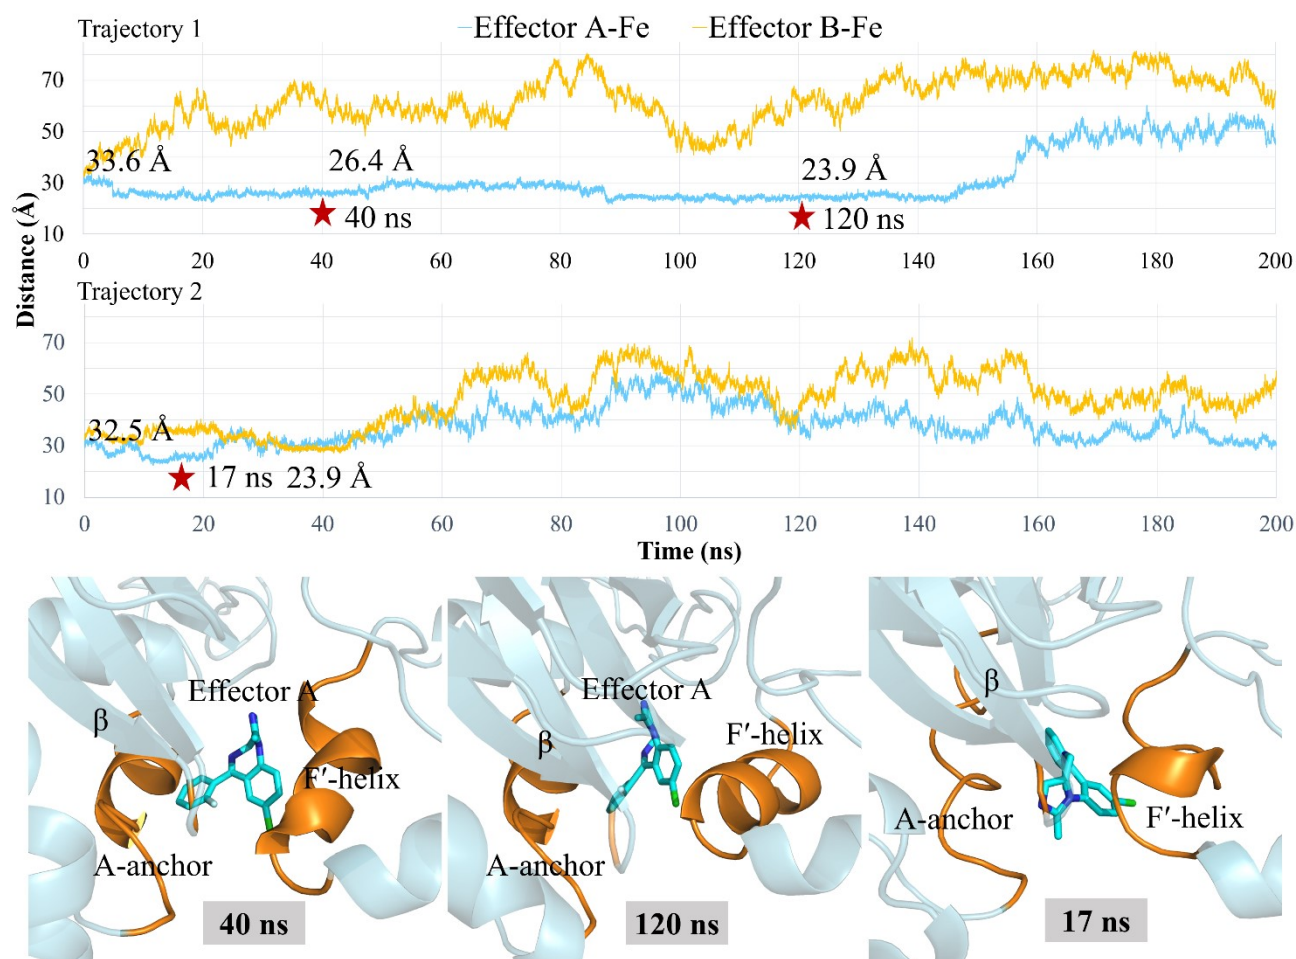

**Fig. S7** The distance between effectors and heme iron in the aMD trajectories 1 and 2. The representative conformations of Effector A at 40, 120, 17 ns are shown as cartoons, respectively.

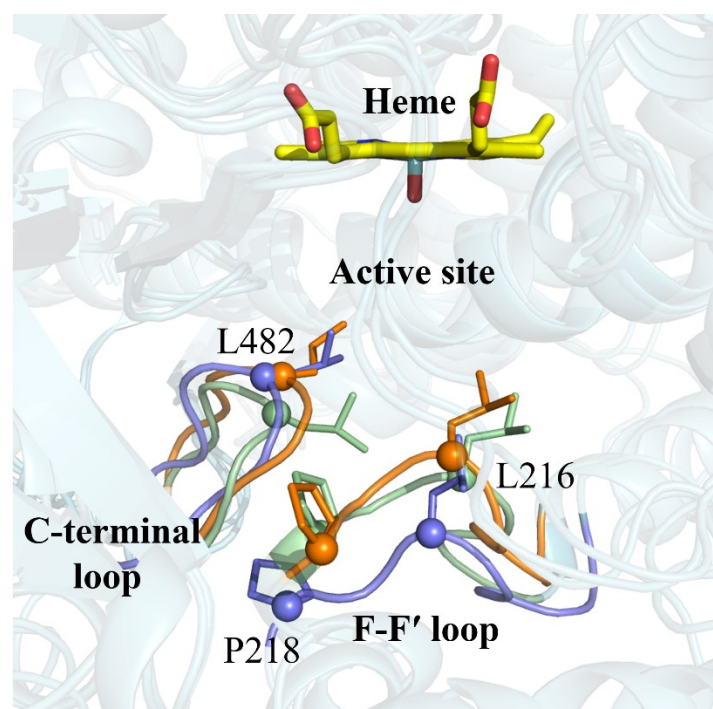

**Fig. S8** The superimposed conformation of three representative substrate-binding poses (pose **A**, **B** and **C**) in CYP3A4-MDZ-effectors complex. The F-F' and C-terminal loops are highlight in orange, pale green and blue in pose **A**, **B** and **C**, respectively.

## References

1. M. Redhair, J. C. Hackett, R. D. Pelletier and W. M. Atkins, *Biochemistry*, 2020, **59**, 766-779.
2. I. G. Denisov, Y. V. Grinkova, T. Camp, M. A. McLean and S. G. Sligar, *Biochemistry*, 2021, **60**, 1670-1681.
